# Supplementary material for: Catalytic Upgrading of Residual Fat Pyrolysis Vapors over Activated Carbon Pellets into Hydrocarbons-like Fuels in a Two-Stage Reactor: Analysis of Hydrocarbons Composition and Physical-Chemistry Properties
Source: MDPI journal article supplement (doi:10.3390/en15134587), 2022-06-23
Supplement: s1 [file s1]

Table S1 Classes of compounds, summation of peak areas, CAS number, and retention times of chemical compounds identified by CG-MS in bio-oil by pyrolysis of residual fat at 400 °C, 1.0 atm, 50 min, using a pyrolysis reactor of 2.0 L, in semi-pilot scale.

| 400°C                                  |          |            |               |
|----------------------------------------|----------|------------|---------------|
| Class of Compounds: Chemical Compounds | RT [min] | CAS        | ω (area.%)    |
| <b>Alkanes</b>                         |          |            |               |
| Heptane                                | 4.504    | 142-82-5   | 0.650         |
| Octane                                 | 6.803    | 111-65-9   | 0.874         |
| Nonane                                 | 9.723    | 111-84-2   | 0.899         |
| Decane                                 | 12.913   | 124-18-5   | 0.506         |
| Undecane                               | 16.107   | 112-40-3   | 0.730         |
| Dodecane                               | 19.180   | 112-40-3   | 1.036         |
| Tridecane                              | 22.100   | 629-50-5   | 2.506         |
| Tetradecane                            | 24.860   | 629-59-4   | 2.255         |
| Pentadecane                            | 27.454   | 629-62-9   | 6.816         |
| Hexadecane                             | 29.961   | 544-76-3   | 1.947         |
| Heptadecane                            | 32.416   | 629-78-7   | 5.106         |
| Σ (Area.%) =                           |          |            | <b>23.325</b> |
| <b>Alkenes</b>                         |          |            |               |
| 1-Heptene                              | 4.350    | 592-76-7   | 0.806         |
| 1-Octene                               | 6.572    | 111-66-0   | 0.573         |
| 1-Nonene                               | 9.457    | 124-11-8   | 0.550         |
| 1-Decene                               | 12.633   | 872-05-9   | 0.614         |
| 1-Undecene                             | 15.841   | 821-95-4   | 1.181         |
| 5-Undecene                             | 16.243   | 4941-53-1  | 1.405         |
| 2-Undecene, (E)-                       | 16.553   | 693-61-8   | 0.654         |
| 1-Dodecene                             | 18.937   | 112-41-4   | 1.036         |
| 4-Undecene, 3-methyl-, (Z)-            | 19.314   | 74645-87-7 | 0.149         |
| 1-Tridecene                            | 21.871   | 2437-56-1  | 1.803         |
| 1-Tetradecene                          | 24.654   | 1120-36-1  | 2.696         |
| 1-Pentadecene                          | 27.274   | 13360-61-7 | 2.629         |
| 7-Hexadecene, (Z)-                     | 29.596   | 35507-09-6 | 1.228         |
| Cetene                                 | 29.775   | 629-73-2   | 2.335         |
| 8-Heptadecene                          | 32.036   | 54290-12-9 | 5.181         |
| 1-Heptadecene                          | 32.290   | 6765-39-5  | 1.815         |
| 1-Octadecene                           | 33.832   | 112-88-9   | 2.572         |
| 9-Hexacosene                           | 53.020   | 71502-22-2 | 5.454         |
| Σ (Area.%) =                           |          |            | <b>32.681</b> |
| <b>Alkynes</b>                         |          |            |               |
| 13-Hexacosyne                          | 52.535   | 34291-68-4 | 4.524         |
| Σ (Area.%) =                           |          |            | <b>4.524</b>  |
| <b>Ring-containing Alkanes</b>         |          |            |               |
| Cyclopentane, nonyl-                   | 26.403   | 2882-98-6  | 0.357         |
| n-Nonylcyclohexane                     | 29.112   | 2883-02-5  | 0.744         |
| Cyclotetracosane                       | 48.767   | 297-03-0   | 10.319        |
| Σ (Area.%) =                           |          |            | <b>11.420</b> |
| <b>Carboxylic Acids</b>                |          |            |               |
| Propanoic acid                         | 3.975    | 79-09-4    | 0.162         |
| Butanoic acid                          | 5.903    | 107-92-6   | 0.212         |
| Pentanoic acid                         | 8.654    | 109-52-4   | 0.416         |
| Hexanoic acid                          | 11.760   | 142-62-1   | 0.615         |
| Heptanoic acid                         | 14.895   | 111-14-8   | 0.776         |
| Octanoic acid                          | 17.979   | 124-07-2   | 1.265         |
| Nonanoic acid                          | 20.903   | 112-05-0   | 0.650         |
| n-Decanoic acid                        | 23.737   | 334-48-5   | 5.432         |
| Tetradecanoic acid                     | 33.451   | 544-63-8   | 2.250         |
| n-Hexadecanoic acid                    | 38.011   | 57-10-3    | 9.238         |
| Oleic Acid                             | 44.012   | 112-80-1   | 1.051         |

|                                         |        |           |                |
|-----------------------------------------|--------|-----------|----------------|
| $\Sigma$ (Area.%) =                     |        |           | <b>23.657</b>  |
| <b>Ketones</b>                          |        |           |                |
| 2-Heptadecanone                         | 36.536 | 2922-51-2 | 1.596          |
| $\Sigma$ (Area.%) =                     |        |           | <b>1.596</b>   |
| <b>Alcohols</b>                         |        |           |                |
| Behenic alcohol                         | 45.115 | 661-19-8  | 1.835          |
| $\Sigma$ (Area.%) =                     |        |           | <b>1.835</b>   |
| <b>Aldehydes</b>                        |        |           |                |
| 2H-Pyran-2-carboxaldehyde, 3,4-dihydro- | 13.967 | 100-73-2  | 0.381          |
| $\Sigma$ (Area.%) =                     |        |           | <b>0.381</b>   |
| <b>Non-identified compounds</b>         |        |           | 0.581          |
| $\Sigma$ (Area.%) =                     |        |           | <b>0.581</b>   |
| <b>Total</b>                            |        |           | <b>100.000</b> |

---

Table S2: Classes of compounds, summation of peak areas, CAS number, and retention times of chemical compounds identified by CG-MS in bio-oil by pyrolysis of residual fat at 400 °C, 1.0 atm, 60 min, using a pyrolysis reactor of 2.0 L, in semi-pilot scale.

| 400°C                                  |          |            |                |
|----------------------------------------|----------|------------|----------------|
| Class of Compounds: Chemical Compounds | RT [min] | CAS        | α (area.%)     |
| <b>Alkanes</b>                         |          |            |                |
| Heptane                                | 4.498    | 142-82-5   | 1.283          |
| Octane                                 | 6.788    | 111-65-9   | 1.933          |
| Nonane                                 | 9.704    | 111-84-2   | 1.824          |
| Decane                                 | 12.885   | 124-18-5   | 1.431          |
| Undecane                               | 16.080   | 112-40-3   | 1.826          |
| Dodecane                               | 19.157   | 112-40-3   | 2.631          |
| Tridecane                              | 22.076   | 629-50-5   | 4.698          |
| Tetradecane                            | 24.830   | 629-59-4   | 5.921          |
| Pentadecane                            | 27.431   | 629-62-9   | 10.059         |
| Heptadecane                            | 32.395   | 629-78-7   | 7.653          |
| Σ (Area.%) =                           |          |            | <b>39.259</b>  |
| <b>Alkenes</b>                         |          |            |                |
| 1-Heptene                              | 4.339    | 592-76-7   | 1.168          |
| 1-Octene                               | 6.555    | 111-66-0   | 1.188          |
| 1-Nonene                               | 9.444    | 124-11-8   | 1.312          |
| 1-Decene                               | 12.611   | 872-05-9   | 1.246          |
| 1-Undecene                             | 15.821   | 821-95-4   | 1.774          |
| 5-Undecene                             | 16.222   | 4941-53-1  | 0.625          |
| 2-Undecene, (E)-                       | 16.538   | 693-61-8   | 0.240          |
| 1-Dodecene                             | 18.908   | 112-41-4   | 2.146          |
| 1-Tridecene                            | 21.851   | 2437-56-1  | 4.074          |
| 1-Tetradecene                          | 24.625   | 1120-36-1  | 5.538          |
| 1-Pentadecene                          | 27.246   | 13360-61-7 | 6.459          |
| 1-Heptadecene                          | 32.269   | 6765-39-5  | 4.146          |
| 9-Hexacosene                           | 52.987   | 71502-22-2 | 7.648          |
| Σ (Area.%) =                           |          |            | <b>37.564</b>  |
| <b>Ring-containing Alkanes</b>         |          |            |                |
| Cyclopentane, nonyl-                   | 26.383   | 2882-98-6  | 0.465          |
| n-Nonylcyclohexane                     | 29.076   | 2883-02-5  | 0.966          |
| Cyclotetracosane                       | 48.830   | 297-03-0   | 10.261         |
| Σ (Area.%) =                           |          |            | <b>11.692</b>  |
| <b>Carboxylic Acids</b>                |          |            |                |
| n-Decanoic acid                        | 23.651   | 334-48-5   | 1.45           |
| n-Hexadecanoic acid                    | 37.942   | 57-10-3    | 2.896          |
| Σ (Area.%) =                           |          |            | <b>4.346</b>   |
| <b>Ketones</b>                         |          |            |                |
| 2-Heptadecanone                        | 36.518   | 2922-51-2  | 3.316          |
| 2-Nonadecanone                         | 42.888   | 629-66-3   | 1.827          |
| Σ (Area.%) =                           |          |            | <b>5.143</b>   |
| <b>Non-identified compounds</b>        |          |            |                |
|                                        |          |            | 1.994          |
| Σ (Area.%) =                           |          |            | <b>1.994</b>   |
| <b>Total</b>                           |          |            | <b>100.000</b> |

Table S3: Classes of compounds, summation of peak areas, CAS number, and retention times of chemical compounds identified by CG-MS in bio-oil by pyrolysis of residual fat at 400 °C, 1.0 atm, 70 min, using a pyrolysis reactor of 2.0 L, in semi-pilot scale.

| 400°C                                  |          |            |                |
|----------------------------------------|----------|------------|----------------|
| Class of Compounds: Chemical Compounds | RT [min] | CAS        | α (area.%)     |
| <b>Alkanes</b>                         |          |            |                |
| Heptane                                | 4.476    | 142-82-5   | 0.820          |
| Octane                                 | 6.786    | 111-65-9   | 1.537          |
| Nonane                                 | 9.703    | 111-84-2   | 1.988          |
| Decane                                 | 12.891   | 124-18-5   | 2.228          |
| Undecane                               | 16.083   | 112-40-3   | 2.833          |
| Dodecane                               | 19.159   | 112-40-3   | 3.581          |
| Tridecane                              | 22.083   | 629-50-5   | 4.955          |
| Tetradecane                            | 24.839   | 629-59-4   | 5.587          |
| Pentadecane                            | 27.444   | 629-62-9   | 7.414          |
| Hexadecane                             | 29.940   | 544-76-3   | 5.420          |
| Heptadecane                            | 32.403   | 629-78-7   | 6.542          |
| Octadecane                             | 34.227   | 593-45-3   | 2.012          |
| Σ (Area.%) =                           |          |            | <b>44.917</b>  |
| <b>Alkenes</b>                         |          |            |                |
| 1-Heptene                              | 4.328    | 592-76-7   | 0.988          |
| 1-Hexene, 3-methyl-                    | 4.615    | 3404-61-3  | 0.116          |
| 1-Octene                               | 6.559    | 111-66-0   | 1.477          |
| 2-Octene                               | 6.938    | 111-67-1   | 0.111          |
| 1-Nonene                               | 9.438    | 124-11-8   | 1.971          |
| 1-Decene                               | 12.614   | 872-05-9   | 2.438          |
| 1-Undecene                             | 15.822   | 821-95-4   | 3.310          |
| 5-Undecene                             | 16.221   | 4941-53-1  | 0.431          |
| 1-Dodecene                             | 18.918   | 112-41-4   | 3.802          |
| 1-Tridecene                            | 21.857   | 2437-56-1  | 5.165          |
| 1-Tetradecene                          | 24.635   | 1120-36-1  | 6.067          |
| 1-Pentadecene                          | 27.257   | 13360-61-7 | 7.935          |
| Cetene                                 | 29.758   | 629-73-2   | 5.675          |
| 1-Heptadecene                          | 32.278   | 6765-39-5  | 6.000          |
| Σ (Area.%) =                           |          |            | <b>45.486</b>  |
| <b>Ring-containing Alkenes</b>         |          |            |                |
| Cyclopentene, 1-methyl-                | 3.755    | 693-89-0   | 0.157          |
| Cyclopentane, ethyl-                   | 5.371    | 1640-89-7  | 0.057          |
| 1-Ethylcyclopentene                    | 5.803    | 2146-38-5  | 0.077          |
| Σ (Area.%) =                           |          |            | <b>0.291</b>   |
| <b>Ketones</b>                         |          |            |                |
| 4-hydroxy-2-butanone                   | 3.155    | 590-90-9   | 0.080          |
| 2-Heptadecanone                        | 36.520   | 2922-51-2  | 4.292          |
| 3-Octadecanone                         | 39.129   | 18261-92-2 | 1.592          |
| 2-Nonadecanone                         | 42.894   | 629-66-3   | 3.070          |
| Σ (Area.%) =                           |          |            | <b>9.034</b>   |
| <b>Total</b>                           |          |            | <b>100.000</b> |

Table S4: Classes of compounds, summation of peak areas, CAS number, and retention times of chemical compounds identified by CG-MS in bio-oil by pyrolysis of residual fat at 400 °C, 1.0 atm, 80 min, using a pyrolysis reactor of 2.0 L, in semi-pilot scale.

| 400°C                                  |          |             |                |
|----------------------------------------|----------|-------------|----------------|
| Class of Compounds: Chemical Compounds | RT [min] | CAS         | α (area.%)     |
| <b>Alkanes</b>                         |          |             |                |
| Heptane                                | 4.498    | 142-82-5    | 0.912          |
| Octane                                 | 6.788    | 111-65-9    | 1.578          |
| Nonane                                 | 9.706    | 111-84-2    | 1.930          |
| Decane                                 | 12.889   | 124-18-5    | 2.057          |
| Undecane                               | 16.081   | 112-40-3    | 2.837          |
| Dodecane                               | 19.153   | 112-40-3    | 3.865          |
| Tridecane                              | 22.076   | 629-50-5    | 6.103          |
| Tetradecane                            | 24.832   | 629-59-4    | 7.563          |
| Pentadecane                            | 27.432   | 629-62-9    | 10.296         |
| Hexadecane                             | 29.933   | 544-76-3    | 6.481          |
| Heptadecane                            | 32.396   | 629-78-7    | 7.150          |
| Octadecane                             | 34.228   | 593-45-3    | 1.255          |
| Σ (Area.%) =                           |          |             | <b>52.027</b>  |
| <b>Alkenes</b>                         |          |             |                |
| 1-Heptene                              | 4.339    | 592-76-7    | 0.850          |
| 1-Octene                               | 6.559    | 111-66-0    | 1.158          |
| 1-Nonene                               | 9.441    | 124-11-8    | 1.469          |
| 1-Decene                               | 12.613   | 872-05-9    | 1.862          |
| 1-Undecene                             | 15.818   | 821-95-4    | 2.699          |
| 5-Undecene                             | 16.220   | 4941-53-1   | 0.323          |
| 1-Dodecene                             | 18.912   | 112-41-4    | 3.173          |
| 1-Tridecene                            | 21.850   | 2437-56-1   | 5.087          |
| 1-Tetradecene                          | 24.625   | 1120-36-1   | 6.239          |
| 1-Pentadecene                          | 27.249   | 13360-61-7  | 7.534          |
| Cetene                                 | 29.752   | 629-73-2    | 5.246          |
| 1-Heptadecene                          | 32.272   | 6765-39-5   | 4.657          |
| 8-Heptadecene                          | 32.721   | 54290-12-9  | 0.295          |
| Σ (Area.%) =                           |          |             | <b>40.592</b>  |
| <b>Ring-containing Alkanes</b>         |          |             |                |
| n-Nonylcyclohexane                     | 29.083   | 2883-02-5   | 1.334          |
| Σ (Area.%) =                           |          |             | <b>1.334</b>   |
| <b>Ring-containing Alkenes</b>         |          |             |                |
| 1-Cyclohexylnonene                     | 29.548   | 114614-84-5 | 1.184          |
| Σ (Area.%) =                           |          |             | <b>1.184</b>   |
| <b>Ketones</b>                         |          |             |                |
| 2-Heptadecanone                        | 36.515   | 2922-51-2   | 2.858          |
| 3-Octadecanone                         | 39.134   | 18261-92-2  | 0.690          |
| 2-Nonadecanone                         | 42.885   | 629-66-3    | 1.317          |
| Σ (Area.%) =                           |          |             | <b>4.865</b>   |
| <b>Total</b>                           |          |             | <b>100.000</b> |

Table S5: Classes of compounds, summation of peak areas, CAS number, and retention times of chemical compounds identified by CG-MS in bio-oil by catalytic upgrading of residual fat pyrolysis vapors at 400 °C, 1.0 atm, 5.0% (wt.) activated carbon pellets impregnated with 10.0 M NaOH, 50 min, using a catalyst fixed-bed reactor, in semi-pilot scale two-stage reactor of 2.0 L.

| 400°C                                  |          |            |               |
|----------------------------------------|----------|------------|---------------|
| Class of Compounds: Chemical Compounds | RT [min] | CAS        | α (area.%)    |
| <b>Alkanes</b>                         |          |            |               |
| Octane                                 | 6.802    | 111-65-9   | 0.074         |
| Nonane                                 | 9.731    | 111-84-2   | 0.785         |
| Decane                                 | 12.909   | 124-18-5   | 0.187         |
| Undecane                               | 16.092   | 1120-21-4  | 0.221         |
| Dodecane                               | 19.171   | 112-40-3   | 0.245         |
| Tridecane                              | 22.091   | 629-50-5   | 0.614         |
| Tetradecane                            | 24.846   | 629-59-4   | 0.359         |
| Pentadecane                            | 27.448   | 629-62-9   | 2.005         |
| Hexadecane                             | 29.944   | 544-76-3   | 0.400         |
| Heptadecane                            | 32.405   | 629-78-7   | 1.821         |
| Σ (Area.%) =                           |          |            | <b>6.711</b>  |
| <b>Alkenes</b>                         |          |            |               |
| 1-Octene                               | 6.573    | 111-66-0   | 0.107         |
| 1-Nonene                               | 9.457    | 124-11-8   | 0.310         |
| 1-Decene                               | 12.632   | 872-05-9   | 0.604         |
| 1-Undecene                             | 15.835   | 821-95-4   | 0.602         |
| 5-Undecene                             | 16.236   | 4941-53-1  | 0.404         |
| 1-Dodecene                             | 18.931   | 112-41-4   | 0.510         |
| 1-Tridecene                            | 21.871   | 2437-56-1  | 0.760         |
| 1-Tetradecene                          | 24.641   | 1120-36-1  | 0.960         |
| 1-Pentadecene                          | 27.260   | 13360-61-7 | 1.146         |
| Cetene                                 | 29.763   | 629-73-2   | 0.674         |
| 1-Heptadecene                          | 32.026   | 6765-39-5  | 1.351         |
| 8-Heptadecene                          | 32.117   | 54290-12-9 | 0.625         |
| 9-Hexacosene                           | 52.893   | 71502-22-2 | 2.443         |
| Σ (Area.%) =                           |          |            | <b>10.496</b> |
| <b>Alkynes</b>                         |          |            |               |
| 11-Hexacosyne                          | 52.368   | 34291-69-5 | 3.234         |
| Σ (Area.%) =                           |          |            | <b>3.234</b>  |
| <b>Ring-containing Alkanes</b>         |          |            |               |
| Cyclotetracosane                       | 48.751   | 297-03-0   | 3.993         |
| Σ (Area.%) =                           |          |            | <b>3.993</b>  |
| <b>Ring-containing Alkenes</b>         |          |            |               |
| 1H-Indene, 1-ethylidene-               | 22.773   | 2471-83-2  | 1.254         |
| Σ (Area.%) =                           |          |            | <b>1.254</b>  |
| <b>Aromatic Hydrocarbons</b>           |          |            |               |
| Naphthalene                            | 19.490   | 91-20-3    | 1.231         |
| Anthracene                             | 35.142   | 120-12-7   | 0.937         |
| Σ (Area.%) =                           |          |            | <b>2.168</b>  |
| <b>Carboxylic Acids</b>                |          |            |               |
| Butanoic acid                          | 5.912    | 107-92-6   | 0.088         |
| Pentanoic acid                         | 8.676    | 109-52-4   | 0.170         |
| Hexanoic acid                          | 11.765   | 142-62-1   | 0.514         |
| 6-Heptenoic Acid                       | 14.660   | 1119-60-4  | 0.417         |
| Heptanoic Acid                         | 14.867   | 111-14-8   | 0.807         |
| Octanoic acid                          | 17.983   | 124-07-2   | 1.076         |
| Nonanoic acid                          | 20.882   | 112-05-0   | 0.680         |
| n-Decanoic acid                        | 23.758   | 334-48-5   | 5.232         |
| Dodecanoic acid                        | 28.834   | 143-07-7   | 0.333         |

|                     |        |           |                |
|---------------------|--------|-----------|----------------|
| Tetradecanoic acid  | 33.452 | 544-63-8  | 5.521          |
| Pentadecanoic acid  | 34.662 | 1002-84-2 | 2.419          |
| Palmitoleic acid    | 37.490 | 373-49-9  | 1.793          |
| n-Hexadecanoic acid | 38.030 | 57-10-3   | 24.867         |
| Oleic Acid          | 44.018 | 112-80-1  | 13.899         |
| Octadecanoic acid   | 44.616 | 57-11-4   | 13.232         |
| $\Sigma$ (Area.%) = |        |           | <b>71.048</b>  |
| <b>Ketones</b>      |        |           |                |
| 2-Heptadecanone     | 36.526 | 2922-51-2 | 1.098          |
| $\Sigma$ (Area.%) = |        |           | <b>1.098</b>   |
| <b>Total</b>        |        |           | <b>100.000</b> |

---

Table S6: Classes of compounds, summation of peak areas, CAS number, and retention times of chemical compounds identified by CG-MS in bio-oil by catalytic upgrading of residual fat pyrolysis vapors at 400 °C, 1.0 atm, 5.0% (wt.) activated carbon pellets impregnated with 10.0 M NaOH, 60 min, using a catalyst fixed-bed reactor, in semi-pilot scale two-stage reactor of 2.0 L.

| 400°C                                  |          |            |                   |
|----------------------------------------|----------|------------|-------------------|
| Class of Compounds: Chemical Compounds | RT [min] | CAS        | $\alpha$ (area.%) |
| <b>Alkanes</b>                         |          |            |                   |
| Heptane                                | 4.498    | 142-82-5   | 0.073             |
| Octane                                 | 6.785    | 111-65-9   | 0.172             |
| Nonane                                 | 9.711    | 111-84-2   | 0.798             |
| Decane                                 | 12.884   | 124-18-5   | 0.415             |
| Undecane                               | 16.077   | 1120-21-4  | 0.269             |
| Dodecane                               | 19.155   | 112-40-3   | 0.322             |
| Tridecane                              | 22.070   | 629-50-5   | 0.866             |
| Tetradecane                            | 24.827   | 629-59-4   | 0.665             |
| Pentadecane                            | 27.429   | 629-62-9   | 3.153             |
| Hexadecane                             | 29.924   | 544-76-3   | 0.614             |
| Heptadecane                            | 32.395   | 629-78-7   | 2.823             |
| $\Sigma$ (Area.%) =                    |          |            | <b>10.170</b>     |
| <b>Alkenes</b>                         |          |            |                   |
| 1-Heptene                              | 4.340    | 592-76-7   | 0.125             |
| 1-Octene                               | 6.650    | 111-66-0   | 0.212             |
| 1-Nonene                               | 9.439    | 124-11-8   | 0.414             |
| 1-Decene                               | 12.611   | 872-05-9   | 0.698             |
| 1-Undecene                             | 15.816   | 821-95-4   | 0.705             |
| 5-Undecene                             | 16.220   | 4941-53-1  | 0.380             |
| 2-Undecene, (Z)-                       | 16.535   | 821-96-5   | 0.209             |
| 1-Dodecene                             | 18.910   | 112-41-4   | 0.732             |
| 1-Tridecene                            | 21.853   | 2437-56-1  | 0.953             |
| 1-Tetradecene                          | 24.624   | 1120-36-1  | 1.384             |
| 1-Pentadecene                          | 27.245   | 13360-61-7 | 1.715             |
| Cetene                                 | 29.742   | 629-73-2   | 0.988             |
| 1-Heptadecene                          | 32.009   | 6765-39-5  | 1.236             |
| 8-Heptadecene                          | 32.099   | 54290-12-9 | 0.974             |
| 1-Octadecene                           | 33.811   | 112-88-9   | 1.761             |
| 1-Docosene                             | 45.074   | 1599-67-3  | 4.906             |
| 9-Tricosene, (Z)-                      | 47.143   | 27519-02-4 | 2.099             |
| 9-Hexacosene                           | 52.875   | 71502-22-2 | 6.891             |
| $\Sigma$ (Area.%) =                    |          |            | <b>26.382</b>     |
| <b>Alkynes</b>                         |          |            |                   |
| 2,4-Hexadiyne                          | 3.973    | 2809-69-0  | 0.125             |
| $\Sigma$ (Area.%) =                    |          |            | <b>0.125</b>      |
| <b>Ring-containing Alkanes</b>         |          |            |                   |
| n-Nonylcyclohexane                     | 29.082   | 2883-02-5  | 0.512             |
| Cyclotetracosane                       | 48.739   | 297-03-0   | 5.102             |
| $\Sigma$ (Area.%) =                    |          |            | <b>5.614</b>      |
| <b>Ring-containing Alkenes</b>         |          |            |                   |
| Cyclooctene                            | 10.185   | 931-88-4   | 0.114             |
| 1H-Indene, 1-ethylidene-               | 22.752   | 2471-83-2  | 0.189             |
| $\Sigma$ (Area.%) =                    |          |            | <b>0.303</b>      |
| <b>Aromatic Hydrocarbons</b>           |          |            |                   |
| Naphthalene                            | 19.473   | 91-20-3    | 0.438             |
| Naphthalene, 2-methyl-                 | 23.237   | 90-12-0    | 0.166             |
| Phenanthrene                           | 35.127   | 85-01-8    | 0.421             |
| $\Sigma$ (Area.%) =                    |          |            | <b>1.025</b>      |
| <b>Carboxylic Acids</b>                |          |            |                   |



|                     |        |             |                |
|---------------------|--------|-------------|----------------|
| Butanoic acid       | 5.879  | 107-92-6    | 0.101          |
| Pentanoic acid      | 8.636  | 109-52-4    | 0.148          |
| Hexanoic acid       | 11.741 | 142-62-1    | 0.449          |
| Heptanoic acid      | 14.883 | 111-14-8    | 1.105          |
| Octanoic acid       | 17.973 | 124-07-2    | 1.605          |
| 8-Nonenoic acid     | 20.650 | 31642-67-8  | 0.212          |
| Nonanoic acid       | 20.884 | 112-05-0    | 1.316          |
| n-Decanoic acid     | 23.778 | 334-48-5    | 7.995          |
| Undecanoic acid     | 26.307 | 112-37-8    | 1.245          |
| Dodecanoic acid     | 28.816 | 143-07-7    | 0.359          |
| Tetradecanoic acid  | 33.437 | 544-63-8    | 5.183          |
| Pentadecanoic acid  | 34.836 | 1002-84-2   | 1.657          |
| n-Hexadecanoic acid | 39.010 | 57-10-3     | 20.020         |
| Oleic Acid          | 43.980 | 112-80-1    | 5.717          |
| Octadecanoic acid   | 44.594 | 57-11-4     | 6.901          |
| $\Sigma$ (Area.%) = |        |             | <b>54.013</b>  |
| <b>Ketones</b>      |        |             |                |
| 2-Heptadecanone     | 36.509 | 2922-51-2   | 1.202          |
| 2-Nonadecanone      | 42.875 | 629-66-3    | 0.616          |
| $\Sigma$ (Area.%) = |        |             | <b>1.818</b>   |
| <b>Aldehydes</b>    |        |             |                |
| E-14-Hexadecenal    | 32.271 | 330207-53-9 | 0.550          |
| $\Sigma$ (Area.%) = |        |             | <b>0.550</b>   |
| <b>Total</b>        |        |             | <b>100.000</b> |

---

Table S7: Classes of compounds, summation of peak areas, CAS number, and retention times of chemical compounds identified by CG-MS in bio-oil by catalytic upgrading of residual fat pyrolysis vapors at 400 °C, 1.0 atm, 5.0% (wt.) activated carbon pellets impregnated with 10.0 M NaOH, 80 min, using a catalyst fixed-bed reactor, in semi-pilot scale two-stage reactor of 2.0 L.

| 400°C                                  |          |             |               |
|----------------------------------------|----------|-------------|---------------|
| Class of Compounds: Chemical Compounds | RT [min] | CAS         | α (area.%)    |
| <b>Alkanes</b>                         |          |             |               |
| Octane                                 | 6.792    | 111-65-9    | 0.137         |
| Nonane                                 | 9.709    | 111-84-2    | 1.099         |
| Decane                                 | 12.887   | 124-18-5    | 0.277         |
| Undecane                               | 16.080   | 1120-21-4   | 0.373         |
| Dodecane                               | 19.157   | 112-40-3    | 0.585         |
| Tridecane                              | 22.077   | 629-50-5    | 1.275         |
| Tetradecane                            | 24.828   | 629-59-4    | 1.212         |
| Pentadecane                            | 27.431   | 629-62-9    | 4.405         |
| Hexadecane                             | 29.924   | 544-76-3    | 1.272         |
| Heptadecane                            | 32.395   | 629-78-7    | 4.417         |
| Σ (Area.%) =                           |          |             | <b>15.052</b> |
| <b>Alkenes</b>                         |          |             |               |
| 1-Octene                               | 6.564    | 111-66-0    | 0.199         |
| 1-Nonene                               | 9.439    | 124-11-8    | 0.561         |
| 1-Decene                               | 12.610   | 872-05-9    | 1.163         |
| 1-Undecene                             | 15.816   | 821-95-4    | 1.315         |
| 5-Undecene                             | 16.221   | 4941-53-1   | 0.587         |
| 1-Dodecene                             | 18.911   | 112-41-4    | 1.621         |
| 1-Tridecene                            | 21.849   | 2437-56-1   | 2.326         |
| 1-Tetradecene                          | 24.625   | 1120-36-1   | 2.638         |
| 1-Pentadecene                          | 27.246   | 13360-61-7  | 1.953         |
| Cetene                                 | 29.747   | 629-73-2    | 1.742         |
| 1-Heptadecene                          | 32.271   | 6765-39-5   | 3.917         |
| 1-Octadecene                           | 34.098   | 112-88-9    | 0.735         |
| 9-Tricosene, (Z)-                      | 47.146   | 27519-02-4  | 3.155         |
| Z-12-Pentacosene                       | 50.707   |             | 2.587         |
| 9-Hexacosene                           | 52.979   | 71502-22-2  | 7.523         |
| Σ (Area.%) =                           |          |             | <b>32.022</b> |
| <b>Ring-containing Alkanes</b>         |          |             |               |
| n-Octylidencyclohexane                 | 26.908   | 137595-12-1 | 0.438         |
| Σ (Area.%) =                           |          |             | 0.438         |
| <b>Ring-containing Alkenes</b>         |          |             |               |
| 1H-Indene, 1-ethylidene-               | 22.758   | 2471-83-2   | 0.222         |
| Σ (Area.%) =                           |          |             | <b>0.222</b>  |
| <b>Aromatic Hydrocarbons</b>           |          |             |               |
| Naphthalene                            | 19.481   | 91-20-3     | 0.509         |
| Naphthalene, 2-methyl-                 | 23.243   | 90-12-0     | 0.236         |
| Σ (Area.%) =                           |          |             | <b>0.745</b>  |
| <b>Carboxylic Acids</b>                |          |             |               |
| Propanoic acid                         | 3.960    | 79-09-4     | 0.103         |
| Butanoic acid                          | 5.872    | 107-92-6    | 0.102         |
| Pentanoic acid                         | 8.614    | 109-52-4    | 0.156         |
| Hexanoic acid                          | 11.691   | 142-62-1    | 0.419         |
| Heptanoic acid                         | 14.840   | 111-14-8    | 0.971         |
| 7-Octenoic acid                        | 17.704   | 18719-24-9  | 0.349         |
| Octanoic acid                          | 17.939   | 124-07-2    | 1.290         |
| 8-Nonenoic acid                        | 20.657   | 31642-67-8  | 0.461         |
| Nonanoic acid                          | 20.885   | 112-05-0    | 1.907         |
| n-Decanoic acid                        | 23.710   | 334-48-5    | 5.151         |

|                              |        |           |                |
|------------------------------|--------|-----------|----------------|
| Undecanoic acid              | 26.298 | 112-37-8  | 1.845          |
| Dodecanoic acid              | 28.814 | 143-07-7  | 0.470          |
| Tetradecanoic acid           | 33.421 | 544-63-8  | 3.782          |
| n-Hexadecanoic acid          | 37.957 | 57-10-3   | 17.689         |
| Octadecanoic acid            | 44.575 | 57-11-4   | 4.153          |
| $\Sigma$ ( <i>Area</i> ,%) = |        |           | <b>38.848</b>  |
| <b>Ketones</b>               |        |           |                |
| 2-Heptadecanone              | 36.504 | 2922-51-2 | 2.013          |
| 2-Nonadecanone               | 42.873 | 629-66-3  | 1.404          |
| 10-Nonadecanone              | 55.767 | 504-57-4  | 1.727          |
| $\Sigma$ ( <i>Area</i> ,%) = |        |           | <b>5.144</b>   |
| <b>Alcohols</b>              |        |           |                |
| n-Tetracosanol-1             | 48.883 | 506-51-4  | 7.532          |
| $\Sigma$ ( <i>Area</i> ,%) = |        |           | <b>7.532</b>   |
| <b>Total</b>                 |        |           | <b>100.000</b> |

---

Table S8: Classes of compounds, summation of peak areas, CAS number, and retention times of chemical compounds identified by GC-MS in bio-oil by catalytic upgrading of residual fat pyrolysis vapors at 400 °C, 1.0 atm, 5.0% (wt.) activated carbon pellets impregnated with 10.0 M NaOH, 100 min, using a catalyst fixed-bed reactor, in semi-pilot scale two-stage reactor of 2.0 L.

| 400°C                                  |          |            |               |
|----------------------------------------|----------|------------|---------------|
| Class of Compounds: Chemical Compounds | RT [min] | CAS        | α (area.%)    |
| <b>Alkanes</b>                         |          |            |               |
| Octane                                 | 6.789    | 111-65-9   | 0.130         |
| Nonane                                 | 9.714    | 111-84-2   | 1.931         |
| Decane                                 | 12.887   | 124-18-5   | 0.515         |
| Undecane                               | 16.081   | 1120-21-4  | 0.774         |
| Dodecane                               | 19.154   | 112-40-3   | 1.111         |
| Tridecane                              | 22.069   | 629-50-5   | 2.238         |
| Tetradecane                            | 24.831   | 629-59-4   | 2.295         |
| Pentadecane                            | 27.428   | 629-62-9   | 6.971         |
| Hexadecane                             | 29.928   | 544-76-3   | 2.511         |
| Heptadecane                            | 32.395   | 629-78-7   | 7.647         |
| Σ (Area.%) =                           |          |            | <b>26.123</b> |
| <b>Alkenes</b>                         |          |            |               |
| 1-Octene                               | 6.563    | 111-66-0   | 0.157         |
| 1-Nonene                               | 9.439    | 124-11-8   | 0.696         |
| 1-Decene                               | 12.615   | 872-05-9   | 1.999         |
| 1-Undecene                             | 15.817   | 821-95-4   | 2.691         |
| 3-Undecene, (E)-                       | 16.214   | 1002-68-2  | 0.690         |
| 4-Undecene, (E)-                       | 16.528   | 693-62-9   | 0.597         |
| 1-Dodecene                             | 18.910   | 112-41-4   | 3.526         |
| 1-Tridecene                            | 21.849   | 2437-56-1  | 4.330         |
| 1-Tetradecene                          | 24.624   | 1120-36-1  | 5.239         |
| 1-Pentadecene                          | 27.243   | 13360-61-7 | 5.517         |
| Cetene                                 | 29.743   | 629-73-2   | 3.564         |
| 1-Heptadecene                          | 32.268   | 6765-39-5  | 2.792         |
| Σ (Area.%) =                           |          |            | <b>31.798</b> |
| <b>Ring-containing Alkenes</b>         |          |            |               |
| 1,4-Cyclohexadiene                     | 3.625    | 628-41-1   | 0.296         |
| 2-Methylindene                         | 18.199   | 2177-47-1  | 1.412         |
| Σ (Area.%) =                           |          |            | <b>1.708</b>  |
| <b>Aromatic Hydrocarbons</b>           |          |            |               |
| Naphthalene                            | 19.478   | 91-20-3    | 3.057         |
| Naphthalene, 1-methyl-                 | 22.757   | 90-12-0    | 2.237         |
| Naphthalene, 2-methyl-                 | 23.245   | 91-57-6    | 2.032         |
| Anthracene                             | 35.116   | 120-12-7   | 1.373         |
| Σ (Area.%) =                           |          |            | <b>8.699</b>  |
| <b>Carboxylic Acids</b>                |          |            |               |
| Propanoic acid                         | 3.955    | 79-09-4    | 0.161         |
| Butanoic acid                          | 5.864    | 107-92-6   | 0.186         |
| Pentanoic acid                         | 8.615    | 109-52-4   | 0.241         |
| Hexanoic acid                          | 11.685   | 142-62-1   | 0.582         |
| 6-Heptenoic Acid                       | 14.619   | 1119-60-4  | 0.853         |
| Heptanoic acid                         | 14.836   | 111-14-8   | 1.606         |
| Octanoic acid                          | 17.908   | 124-07-2   | 1.042         |
| 8-Nonenoic acid                        | 20.652   | 31642-67-8 | 0.732         |
| Nonanoic acid                          | 20.855   | 112-05-0   | 1.957         |
| n-Decanoic acid                        | 23.659   | 334-48-5   | 3.904         |
| Tetradecanoic acid                     | 33.415   | 544-63-8   | 3.167         |
| n-Hexadecanoic acid                    | 37.931   | 57-10-3    | 11.548        |

|                     |        |           |                |
|---------------------|--------|-----------|----------------|
| $\Sigma$ (Area.%) = |        |           | <b>25.976</b>  |
| <b>Ketones</b>      |        |           |                |
| 2-Heptadecanone     | 36.509 | 2922-51-2 | 3.053          |
| 2-Nonadecanone      | 42.873 | 629-66-3  | 2.638          |
| $\Sigma$ (Area.%) = |        |           | <b>5.691</b>   |
| <b>Total</b>        |        |           | <b>100.000</b> |

---

Table S9: Classes of compounds, summation of peak areas, CAS number, and retention times of chemical compounds identified by GC-MS in bio-oil by catalytic upgrading of residual fat pyrolysis vapors at 400 °C, 1.0 atm, 7.5% (wt.) activated carbon pellets impregnated with 10.0 M NaOH, 70 min, using a catalyst fixed-bed reactor, in semi-pilot scale two-stage reactor of 2.0 L.

| 400°C                                  |         |            |                     |
|----------------------------------------|---------|------------|---------------------|
| Class of Compounds: Chemical Compounds | RT[min] | CAS        | $\omega_i$ (area.%) |
| <b>Alkanes</b>                         |         |            |                     |
| Octane                                 | 6.784   | 111-65-9   | 0.09                |
| Nonane                                 | 9.713   | 111-84-2   | 1.672               |
| Decane                                 | 12.888  | 124-18-5   | 0.459               |
| Undecane                               | 16.079  | 1120-21-4  | 0.685               |
| Dodecane                               | 19.151  | 112-40-3   | 0.998               |
| Tridecane                              | 22.073  | 629-50-5   | 2.353               |
| Tetradecane                            | 24.828  | 629-59-4   | 1.706               |
| Pentadecane                            | 27.431  | 629-62-9   | 7.979               |
| Hexadecane                             | 29.923  | 544-76-3   | 1.42                |
| Heptadecane                            | 32.393  | 629-78-7   | 5.441               |
| $\Sigma$ (Area.%) =                    |         |            | <b>22.803</b>       |
| <b>Alkenes</b>                         |         |            |                     |
| 1-Octene                               | 6.564   | 111-66-0   | 0.105               |
| 1-Nonene                               | 9.440   | 124-11-8   | 0.574               |
| 1-Decene                               | 12.611  | 872-05-9   | 1.696               |
| 1-Undecene                             | 15.817  | 821-95-4   | 1.975               |
| 5-Undecene                             | 16.218  | 4941-53-1  | 0.863               |
| 2-Undecene, (Z)-                       | 16.528  | 821-96-5   | 0.458               |
| 1-Dodecene                             | 18.915  | 112-41-4   | 2.346               |
| 1-Tridecene                            | 21.852  | 2437-56-1  | 2.867               |
| 1-Tetradecene                          | 24.627  | 1120-36-1  | 2.779               |
| 1-Pentadecene                          | 27.243  | 13360-61-7 | 1.983               |
| Cetene                                 | 29.746  | 629-73-2   | 1.48                |
| 8-Heptadecene                          | 32.009  | 06/04/2579 | 3.284               |
| 1-Heptadecene                          | 32.271  | 6765-39-5  | 0.907               |
| $\Sigma$ (Area.%) =                    |         |            | <b>21.317</b>       |
| <b>Ring containing Alkenes</b>         |         |            |                     |
| 2-Methylindene                         | 18.190  | 2177-47-1  | 0.998               |
| $\Sigma$ (Area.%) =                    |         |            | <b>0.998</b>        |
| <b>Aromatic Hydrocarbons</b>           |         |            |                     |
| Benzene, (1-methylethyl)-              | 10.700  | 98-82-8    | 0.225               |
| Naphthalene                            | 19.477  | 91-20-3    | 2.472               |
| Naphthalene, 2-methyl-                 | 22.755  | 91-57-6    | 1.119               |
| Naphthalene, 1-methyl-                 | 23.241  | 90-12-0    | 1.067               |
| Phenanthrene                           | 35.131  | 85-01-8    | 0.835               |
| $\Sigma$ (Area.%) =                    |         |            | <b>5.718</b>        |
| <b>Carboxylic Acids</b>                |         |            |                     |
| Propanoic acid                         | 3.965   | 79-09-4    | 0.192               |
| Butanoic acid                          | 5.878   | 107-92-6   | 0.25                |
| 4-Pentenoic acid                       | 8.409   | 591-80-0   | 0.133               |
| Pentanoic acid                         | 8.635   | 109-52-4   | 0.377               |
| Hexanoic acid                          | 11.736  | 142-62-1   | 1.033               |
| 6-Heptenoic acid                       | 14.637  | 1119-60-4  | 0.988               |
| Heptanoic Acid                         | 14.843  | 111-14-8   | 2.018               |
| Octanoic acid                          | 17.960  | 124-07-2   | 3.041               |
| 8-Nonenoic acid                        | 20.649  | 31642-67-8 | 0.667               |
| Nonanoic acid                          | 20.876  | 112-05-0   | 2.17                |
| n-Decanoic acid                        | 23.735  | 334-48-5   | 11.758              |
| Undecanoic acid                        | 26.308  | 112-37-8   | 0.667               |
| Tetradecanoic acid                     | 33.424  | 544-63-8   | 5.64                |

|                                |        |           |                |
|--------------------------------|--------|-----------|----------------|
| n-Hexadecanoic acid            | 37.944 | 57-10-3   | 17.581         |
| $\Sigma$ (Area.%) =            |        |           | <b>46.515</b>  |
| <b>Ketones</b>                 |        |           |                |
| 2-Heptadecanone                | 36.504 | 2922-51-2 | 1.825          |
| $\Sigma$ (Area.%) =            |        |           | <b>1.825</b>   |
| <b>Non-identified Fraction</b> |        |           | <b>0.824</b>   |
| <b>Total</b>                   |        |           | <b>100.000</b> |

---

Table S10: Classes of compounds, summation of peak areas, CAS number, and retention times of chemical compounds identified by GC-MS in bio-oil by catalytic upgrading of residual fat pyrolysis vapors at 400 °C, 1.0 atm, 7.5% (wt.) activated carbon pellets impregnated with 10.0 M NaOH, 90 min, using a catalyst fixed-bed reactor, in semi-pilot scale two-stage reactor of 2.0 L.

| 400°C                                  |         |            |                     |
|----------------------------------------|---------|------------|---------------------|
| Class of Compounds: Chemical Compounds | RT[min] | CAS        | $\omega_i$ (area.%) |
| <b>Alkanes</b>                         |         |            |                     |
| Octane                                 | 6.789   | 111-65-9   | 0.080               |
| Nonane                                 | 9.717   | 111-84-2   | 1.776               |
| Decane                                 | 12.890  | 124-18-5   | 0.434               |
| Undecane                               | 16.082  | 1120-21-4  | 0.643               |
| Dodecane                               | 19.155  | 112-40-3   | 0.902               |
| Tridecane                              | 22.074  | 629-50-5   | 2.210               |
| Tetradecane                            | 24.826  | 629-59-4   | 1.908               |
| Pentadecane                            | 27.428  | 629-62-9   | 7.919               |
| Hexadecane                             | 29.923  | 544-76-3   | 1.904               |
| Heptadecane                            | 32.390  | 629-78-7   | 6.940               |
| $\Sigma$ (Area.%) =                    |         |            | <b>24.716</b>       |
| <b>Alkenes</b>                         |         |            |                     |
| 2-Octene                               | 6.560   | 111-67-1   | 0.104               |
| 1-Nonene                               | 9.436   | 124-11-8   | 0.513               |
| 1-Decene                               | 12.609  | 872-05-9   | 1.649               |
| 1-Undecene                             | 15.820  | 821-95-4   | 1.975               |
| 2-Undecene, (E)-                       | 16.220  | 693-61-8   | 0.716               |
| 1-Dodecene                             | 18.910  | 112-41-4   | 2.607               |
| 1-Tridecene                            | 21.850  | 2437-56-1  | 3.135               |
| 1-Tetradecene                          | 24.625  | 1120-36-1  | 3.485               |
| 1-Pentadecene                          | 27.244  | 13360-61-7 | 3.465               |
| Cetene                                 | 29.747  | 629-73-2   | 1.834               |
| 8-Heptadecene                          | 32.098  | 06/04/2579 | 0.834               |
| 1-Heptadecene                          | 32.268  | 6765-39-5  | 1.283               |
| $\Sigma$ (Area.%) =                    |         |            | <b>21.600</b>       |
| <b>Ring containing Alkenes</b>         |         |            |                     |
| 1,4-Cyclohexadiene                     | 3.626   | 628-41-1   | 0.159               |
| 2-Methylindene                         | 18.179  | 2177-47-1  | 1.218               |
| $\Sigma$ (Area.%) =                    |         |            | <b>1.377</b>        |
| <b>Aromatic Hydrocarbons</b>           |         |            |                     |
| Benzene, (1-methylethyl)-              | 10.701  | 98-82-8    | 0.239               |
| Naphthalene                            | 19.481  | 91-20-3    | 3.116               |
| Naphthalene, 2-methyl-                 | 22.753  | 91-57-6    | 1.588               |
| Naphthalene, 1-methyl-                 | 23.243  | 90-12-0    | 1.435               |
| Naphthalene, 2-ethenyl-                | 25.007  | 827-54-3   | 0.397               |
| Phenanthrene                           | 35.128  | 85-01-8    | 1.039               |
| $\Sigma$ (Area.%) =                    |         |            | <b>7.814</b>        |
| <b>Carboxylic Acids</b>                |         |            |                     |
| Propanoic acid                         | 3.973   | 79-09-4    | 0.307               |
| Butanoic acid                          | 5.871   | 107-92-6   | 0.277               |
| 4-Pentenoic acid                       | 8.414   | 591-80-0   | 0.285               |
| Pentanoic acid                         | 8.634   | 109-52-4   | 0.377               |
| 5-Hexenoic acid                        | 11.407  | 1577-22-6  | 0.484               |
| Hexanoic acid                          | 11.709  | 142-62-1   | 0.799               |
| 6-Heptenoic acid                       | 14.628  | 1119-60-4  | 1.373               |
| Heptanoic Acid                         | 14.849  | 111-14-8   | 2.184               |
| 7-Octenoic acid                        | 17.771  | 18719-24-9 | 0.997               |
| Octanoic acid                          | 17.949  | 124-07-2   | 2.361               |
| 8-Nonenoic acid                        | 20.648  | 31642-67-8 | 1.044               |
| Nonanoic acid                          | 20.881  | 112-05-0   | 3.189               |



|                                |        |           |                |
|--------------------------------|--------|-----------|----------------|
| n-Decanoic acid                | 23.693 | 334-48-5  | 7.92           |
| Undecanoic acid                | 26.298 | 112-37-8  | 1.903          |
| Tetradecanoic acid             | 33.418 | 544-63-8  | 3.706          |
| n-Hexadecanoic acid            | 37.940 | 57-10-3   | 12.438         |
| $\Sigma$ (Area.%) =            |        |           | <b>39.644</b>  |
| <b>Alcohols</b>                |        |           |                |
| Phenol                         | 12.139 | 108-95-2  | 0.261          |
| $\Sigma$ (Area.%) =            |        |           | <b>0.261</b>   |
| <b>Ketones</b>                 |        |           |                |
| 2-Pentanone, 4-hydroxy-        | 7.250  | 4161-60-8 | 0.069          |
| 2-Heptadecanone                | 36.509 | 2922-51-2 | 1.658          |
| 2-Nonadecanone                 | 42.882 | 629-66-3  | 0.863          |
| $\Sigma$ (Area.%) =            |        |           | <b>2.590</b>   |
| <b>Non-identified Fraction</b> |        |           | <b>1.998</b>   |
| <b>Total</b>                   |        |           | <b>100.000</b> |

---

Table S11: Classes of compounds, summation of peak areas, CAS number, and retention times of chemical compounds identified by GC-MS in bio-oil by catalytic upgrading of residual fat pyrolysis vapors at 400 °C, 1.0 atm, 7.5% (wt.) activated carbon pellets impregnated with 10.0 M NaOH, 120 min, using a catalyst fixed-bed reactor, in semi-pilot scale two-stage reactor of 2.0 L.

| 400°C                                  |         |            |               |
|----------------------------------------|---------|------------|---------------|
| Class of Compounds: Chemical Compounds | RT[min] | CAS        | wt% (Area)    |
| <b>Alkanes</b>                         |         |            |               |
| Octane                                 | 6.789   | 111-65-9   | 0.171         |
| Nonane                                 | 9.709   | 111-84-2   | 1.376         |
| Decane                                 | 12.890  | 124-18-5   | 0.651         |
| Undecane                               | 16.078  | 1120-21-4  | 0.908         |
| Dodecane                               | 19.154  | 112-40-3   | 1.167         |
| Tridecane                              | 22.071  | 629-50-5   | 2.860         |
| Tetradecane                            | 24.826  | 629-59-4   | 2.926         |
| Pentadecane                            | 27.430  | 629-62-9   | 12.811        |
| Hexadecane                             | 29.927  | 544-76-3   | 2.865         |
| Heptadecane                            | 32.396  | 629-78-7   | 10.433        |
| Octadecane                             | 34.221  | 593-45-3   | 0.457         |
| Nonadecane                             | 36.381  | 629-92-5   | 0.403         |
| Cyclotetracosane                       | 48.740  | 297-03-0   | 1.097         |
| <b>Σ (Area.%) =</b>                    |         |            | <b>38.125</b> |
| <b>Alkenes</b>                         |         |            |               |
| 2-Octene                               | 6.557   | 111-67-1   | 0.207         |
| 1-Nonene                               | 9.439   | 124-11-8   | 0.802         |
| 1-Decene                               | 12.612  | 872-05-9   | 1.478         |
| 1-Undecene                             | 15.815  | 821-95-4   | 1.431         |
| 2-Undecene, E-                         | 16.222  | 693-61-8   | 0.567         |
| 2-Undecene, (Z)-                       | 16.539  | 821-96-5   | 0.303         |
| 1-Dodecene                             | 18.912  | 112-41-4   | 1.460         |
| 1-Tridecene                            | 21.848  | 2437-56-1  | 2.268         |
| 1-Tetradecene                          | 24.624  | 1120-36-1  | 3.493         |
| 1-Pentadecene                          | 27.241  | 13360-61-7 | 3.481         |
| Cetene                                 | 29.747  | 629-73-2   | 2.885         |
| 8-Heptadecene                          | 32.009  | 06/04/2579 | 7.919         |
| 1-Heptadecene                          | 32.715  | 6765-39-5  | 0.279         |
| 1-octadecene                           | 33.819  | 112-88-9   | 1.512         |
| 1-Docosene                             | 45.065  | 1599-67-3  | 0.901         |
| <b>Σ (Area.%) =</b>                    |         |            | <b>28.986</b> |
| <b>Aromatic Hydrocarbons</b>           |         |            |               |
| Benzene, (1-methylethyl)-              | 10.702  | 98-82-8    | 0.181         |
| Naphthalene                            | 19.477  | 91-20-3    | 0.625         |
| Phenanthrene                           | 35.121  | 85-01-8    | 0.446         |
| <b>Σ (Area.%) =</b>                    |         |            | <b>1.252</b>  |
| <b>Carboxylic Acids</b>                |         |            |               |
| Propanoic acid                         | 3.949   | 79-09-4    | 0.093         |
| Butanoic acid                          | 5.861   | 107-92-6   | 0.068         |
| Hexanoic acid                          | 11.682  | 142-62-1   | 0.316         |
| Heptanoic Acid                         | 14.830  | 111-14-8   | 0.808         |
| Octanoic acid                          | 17.939  | 124-07-2   | 1.540         |
| Nonanoic acid                          | 20.882  | 112-05-0   | 2.005         |
| n-Decanoic acid                        | 23.765  | 334-48-5   | 13.044        |
| Undecanoic acid                        | 26.307  | 112-37-8   | 1.047         |
| Tetradecanoic acid                     | 33.426  | 544-63-8   | 3.645         |
| n-Hexadecanoic acid                    | 37.935  | 57-10-3    | 5.177         |
| <b>Σ (Area.%) =</b>                    |         |            | <b>27.743</b> |
| <b>Ketones</b>                         |         |            |               |
| 2-Heptadecanone                        | 36.506  | 2922-51-2  | 2.163         |

|                         |        |            |       |
|-------------------------|--------|------------|-------|
| 3-Octadecanone          | 39.108 | 18261-92-2 | 0.424 |
| 2-Nonadecanone          | 42.863 | 629-66-3   | 0.707 |
| $\Sigma$ (Area.%) =     |        |            | 3.294 |
| Non-identified Fraction |        |            | 0.599 |
| Total                   |        |            | 100   |

---

Table S12: Classes of compounds, summation of peak areas, CAS number, and retention times of chemical compounds identified by GC-MS in bio-oil by catalytic upgrading of residual fat pyrolysis vapors at 400 °C, 1.0 atm, 10.0% (wt.) activated carbon pellets impregnated with 10.0 M NaOH, 60 min, using a catalyst fixed-bed reactor, in semi-pilot scale two-stage reactor of 2.0 L.

| 400°C                                  |         |            |                     |
|----------------------------------------|---------|------------|---------------------|
| Class of Compounds: Chemical Compounds | RT[min] | CAS        | $\omega_i$ (area.%) |
| <b>Alkanes</b>                         |         |            |                     |
| Octane                                 | 6.788   | 111-65-9   | 0.082               |
| Nonane                                 | 9.718   | 111-84-2   | 1.625               |
| Decane                                 | 12.887  | 124-18-5   | 0.473               |
| Undecane                               | 16.075  | 1120-21-4  | 0.728               |
| Dodecane                               | 19.153  | 112-40-3   | 0.884               |
| Tridecane                              | 22.072  | 629-50-5   | 2.093               |
| Tetradecane                            | 24.828  | 629-59-4   | 1.523               |
| Pentadecane                            | 27.428  | 629-62-9   | 6.961               |
| Hexadecane                             | 29.927  | 544-76-3   | 1.216               |
| Heptadecane                            | 32.392  | 629-78-7   | 4.572               |
| $\Sigma$ (Area.%) =                    |         |            | <b>20.157</b>       |
| <b>Ring containing Alkanes</b>         |         |            |                     |
| Indane                                 | 14.080  | 496-11-7   | 0.167               |
| Cyclotetracosane                       | 48.742  | 297-03-0   | 3.955               |
| $\Sigma$ (Area.%) =                    |         |            | <b>4.122</b>        |
| <b>Alkenes</b>                         |         |            |                     |
| 1-Octene                               | 6.554   | 111-66-0   | 0.104               |
| 1-Nonene                               | 9.439   | 124-11-8   | 0.569               |
| 1-Decene                               | 12.612  | 872-05-9   | 1.669               |
| 1-Undecene                             | 15.815  | 821-95-4   | 1.704               |
| 5-Undecene                             | 16.213  | 4941-53-1  | 1.816               |
| 1-Dodecene                             | 18.911  | 112-41-4   | 1.643               |
| 1-Tridecene                            | 21.847  | 2437-56-1  | 2.013               |
| 1-Tetradecene                          | 24.625  | 1120-36-1  | 2.481               |
| 1-Pentadecene                          | 27.245  | 13360-61-7 | 2.617               |
| Cetene                                 | 29.744  | 629-73-2   | 1.530               |
| 8-Heptadecene                          | 32.010  | 06/04/2579 | 3.773               |
| 1-Heptadecene                          | 32.268  | 6765-39-5  | 0.857               |
| 1-Octadecene                           | 33.816  | 112-88-9   | 1.475               |
| $\Sigma$ (Area.%) =                    |         |            | <b>22.251</b>       |
| <b>Ring containing Alkenes</b>         |         |            |                     |
| 2-Methylindene                         | 18.185  | 2177-47-1  | 0.797               |
| $\Sigma$ (Area.%) =                    |         |            | <b>0.797</b>        |
| <b>Alkynes</b>                         |         |            |                     |
| 4-Nonen-2-yne, (Z)-                    | 13.724  | 53497-78-2 | 0.147               |
| $\Sigma$ (Area.%) =                    |         |            | <b>0.147</b>        |
| <b>Aromatic Hydrocarbons</b>           |         |            |                     |
| Benzene, (1-methylethyl)-              | 10.700  | 98-82-8    | 0.225               |
| Naphthalene                            | 19.479  | 91-20-3    | 3.063               |
| Naphthalene, 2-methyl-                 | 22.757  | 91-57-6    | 1.071               |
| Naphthalene, 1-methyl-                 | 23.240  | 90-12-0    | 0.897               |
| Phenanthrene                           | 35.118  | 85-01-8    | 1.195               |
| $\Sigma$ (Area.%) =                    |         |            | <b>6.451</b>        |
| <b>Carboxylic Acids</b>                |         |            |                     |
| Propanoic acid                         | 3.962   | 79-09-4    | 0.148               |
| Butanoic acid                          | 5.878   | 107-92-6   | 0.198               |
| Pentanoic acid                         | 8.631   | 109-52-4   | 0.339               |
| Hexanoic acid                          | 11.736  | 142-62-1   | 1.038               |
| 6-Heptenoic acid                       | 14.633  | 1119-60-4  | 0.763               |
| Heptanoic Acid                         | 14.843  | 111-14-8   | 2.078               |

|                                       |        |            |                |
|---------------------------------------|--------|------------|----------------|
| Octanoic acid                         | 17.961 | 124-07-2   | 2.774          |
| 8-Nonenoic acid                       | 20.652 | 31642-67-8 | 0.489          |
| Nonanoic acid                         | 20.867 | 112-05-0   | 1.903          |
| n-Decanoic acid                       | 23.733 | 334-48-5   | 11.670         |
| Undecanoic acid                       | 26.303 | 112-37-8   | 0.521          |
| Tetradecanoic acid                    | 33.423 | 544-63-8   | 5.599          |
| n-Hexadecanoic acid                   | 37.946 | 57-10-3    | 15.288         |
| <b><math>\Sigma</math> (Area.%) =</b> |        |            | <b>42.808</b>  |
| <b>Ketones</b>                        |        |            |                |
| 2-Pentanone, 4-hydroxy-               | 7.245  | 4161-60-8  | 0.062          |
| 2-Heptadecanone                       | 36.504 | 2922-51-2  | 1.372          |
| <b><math>\Sigma</math> (Area.%) =</b> |        |            | <b>1.434</b>   |
| <b>Non-identified Fraction</b>        |        |            | <b>1.832</b>   |
| <b>Total</b>                          |        |            | <b>100.000</b> |

---

Table S13: Classes of compounds, summation of peak areas, CAS number, and retention times of chemical compounds identified by GC-MS in bio-oil by catalytic upgrading of residual fat pyrolysis vapors at 400 °C, 1.0 atm, 10.0% (wt.) activated carbon pellets impregnated with 10.0 M NaOH, 70 min, using a catalyst fixed-bed reactor, in semi-pilot scale two-stage reactor of 2.0 L.

| 400°C                                  |         |            |                     |
|----------------------------------------|---------|------------|---------------------|
| Class of Compounds: Chemical Compounds | RT[min] | CAS        | $\omega_i$ (area.%) |
| <b>Alkanes</b>                         |         |            |                     |
| Octane                                 | 6.788   | 111-65-9   | 0.093               |
| Nonane                                 | 9.710   | 111-84-2   | 1.564               |
| Decane                                 | 12.889  | 124-18-5   | 0.433               |
| Undecane                               | 16.076  | 1120-21-4  | 0.642               |
| Dodecane                               | 19.152  | 112-40-3   | 0.789               |
| Tridecane                              | 22.070  | 629-50-5   | 2.002               |
| Tetradecane                            | 24.830  | 629-59-4   | 1.665               |
| Pentadecane                            | 27.429  | 629-62-9   | 7.788               |
| Hexadecane                             | 29.927  | 544-76-3   | 1.620               |
| Heptadecane                            | 32.394  | 629-78-7   | 7.123               |
| $\Sigma$ (Area.%) =                    |         |            | <b>23.719</b>       |
| <b>Ring containing Alkanes</b>         |         |            |                     |
| Cyclotetracosane                       | 48.833  | 297-03-0   | 4.448               |
| $\Sigma$ (Area.%) =                    |         |            | <b>4.448</b>        |
| <b>Alkenes</b>                         |         |            |                     |
| 1-Octene                               | 6.561   | 111-66-0   | 0.106               |
| 1-Nonene                               | 9.433   | 124-11-8   | 0.574               |
| 1-Decene                               | 12.611  | 872-05-9   | 1.588               |
| 1-Undecene                             | 15.813  | 821-95-4   | 1.713               |
| 5-Undecene                             | 16.218  | 4941-53-1  | 1.121               |
| 1-Dodecene                             | 18.908  | 112-41-4   | 1.968               |
| 1-Tridecene                            | 21.849  | 2437-56-1  | 2.455               |
| 1-Tetradecene                          | 24.624  | 1120-36-1  | 2.969               |
| 1-Pentadecene                          | 27.241  | 13360-61-7 | 2.205               |
| Cetene                                 | 29.747  | 629-73-2   | 1.880               |
| 8-Heptadecene                          | 32.101  | 06/04/2579 | 3.239               |
| 1-Heptadecene                          | 32.269  | 6765-39-5  | 1.390               |
| 1-Octadecene                           | 33.805  | 112-88-9   | 1.386               |
| $\Sigma$ (Area.%) =                    |         |            | <b>22.594</b>       |
| <b>Ring containing Alkenes</b>         |         |            |                     |
| 2-Methylindene                         | 18.195  | 2177-47-1  | 0.608               |
| $\Sigma$ (Area.%) =                    |         |            | <b>0.608</b>        |
| <b>Alkynes</b>                         |         |            |                     |
| 4-Nonen-2-yne, (Z)-                    | 13.726  | 53497-78-2 | 0.127               |
| $\Sigma$ (Area.%) =                    |         |            | <b>0.127</b>        |
| <b>Aromatic Hydrocarbons</b>           |         |            |                     |
| Benzene, (1-methylethyl)-              | 10.703  | 98-82-8    | 0.214               |
| Naphthalene                            | 19.475  | 91-20-3    | 1.348               |
| Naphthalene, 2-methyl-                 | 22.749  | 91-57-6    | 0.394               |
| Naphthalene, 1-methyl-                 | 23.242  | 90-12-0    | 0.378               |
| $\Sigma$ (Area.%) =                    |         |            | <b>2.334</b>        |
| <b>Carboxylic Acids</b>                |         |            |                     |
| Propanoic acid                         | 3.956   | 79-09-4    | 0.144               |
| Butanoic acid                          | 5.872   | 107-92-6   | 0.165               |
| 2-Pentenoic acid                       | 8.396   | 626-98-2   | 0.087               |
| Pentanoic acid                         | 8.606   | 109-52-4   | 0.244               |
| Hexanoic acid                          | 11.698  | 142-62-1   | 0.704               |
| 6-Heptenoic acid                       | 14.626  | 1119-60-4  | 0.675               |
| Heptanoic Acid                         | 14.842  | 111-14-8   | 1.629               |
| 7-Octenoic acid                        | 17.693  | 18719-24-9 | 0.610               |

|                                       |        |            |                |
|---------------------------------------|--------|------------|----------------|
| Octanoic acid                         | 17.938 | 124-07-2   | 2.054          |
| 8-Nonenoic acid                       | 20.650 | 31642-67-8 | 0.583          |
| Nonanoic acid                         | 20.876 | 112-05-0   | 2.731          |
| 9-Decenoic acid                       | 23.485 | 14436-32-9 | 0.401          |
| n-Decanoic acid                       | 23.714 | 334-48-5   | 10.772         |
| Undecanoic acid                       | 26.298 | 112-37-8   | 0.785          |
| Tetradecanoic acid                    | 33.420 | 544-63-8   | 4.901          |
| n-Hexadecanoic acid                   | 37.941 | 57-10-3    | 15.494         |
| <b><math>\Sigma</math> (Area.%) =</b> |        |            | <b>41.979</b>  |
| <b>Ketones</b>                        |        |            |                |
| 2-Pentanone, 4-hydroxy-               | 7.247  | 4161-60-8  | 0.074          |
| 2-Heptadecanone                       | 36.508 | 2922-51-2  | 1.796          |
| 2-Nonadecanone                        | 42.873 | 629-66-3   | 0.860          |
| <b><math>\Sigma</math> (Area.%) =</b> |        |            | <b>2.730</b>   |
| <b>Non-identified Fraction</b>        |        |            | <b>1.460</b>   |
| <b>Total</b>                          |        |            | <b>100.000</b> |

---

Table S14: Classes of compounds, summation of peak areas, CAS number, and retention times of chemical compounds identified by GC-MS in bio-oil by catalytic upgrading of residual fat pyrolysis vapors at 400 °C, 1.0 atm, 10.0% (wt.) activated carbon pellets impregnated with 10.0 M NaOH, 90 min, using a catalyst fixed-bed reactor, in semi-pilot scale two-stage reactor of 2.0 L.

| 400°C                                  |         |            |                     |
|----------------------------------------|---------|------------|---------------------|
| Class of Compounds: Chemical Compounds | RT[min] | CAS        | $\omega_i$ (area.%) |
| <b>Alkanes</b>                         |         |            |                     |
| Octane                                 | 6.793   | 111-65-9   | 0.117               |
| Nonane                                 | 9.709   | 111-84-2   | 2.204               |
| Decane                                 | 12.886  | 124-18-5   | 0.801               |
| Undecane                               | 16.078  | 1120-21-4  | 1.229               |
| Dodecane                               | 19.155  | 112-40-3   | 1.607               |
| Tridecane                              | 22.071  | 629-50-5   | 2.987               |
| Tetradecane                            | 24.826  | 629-59-4   | 3.028               |
| Pentadecane                            | 27.427  | 629-62-9   | 9.212               |
| Hexadecane                             | 29.925  | 544-76-3   | 3.138               |
| Heptadecane                            | 32.393  | 629-78-7   | 9.224               |
| $\Sigma$ (Area.%) =                    |         |            | <b>33.547</b>       |
| <b>Alkenes</b>                         |         |            |                     |
| 1-Octene                               | 6.562   | 111-66-0   | 0.161               |
| 1-Nonene                               | 9.440   | 124-11-8   | 0.841               |
| 1-Decene                               | 12.611  | 872-05-9   | 2.682               |
| 1-Undecene                             | 15.813  | 821-95-4   | 3.154               |
| 5-Undecene                             | 16.212  | 4941-53-1  | 0.953               |
| 1-Dodecene                             | 18.907  | 112-41-4   | 3.880               |
| 1-Tridecene                            | 21.850  | 2437-56-1  | 4.404               |
| 1-Tetradecene                          | 24.624  | 1120-36-1  | 4.767               |
| 1-Pentadecene                          | 27.243  | 13360-61-7 | 3.733               |
| Cetene                                 | 29.742  | 629-73-2   | 3.025               |
| 8-Heptadecene                          | 32.105  | 06/04/2579 | 3.745               |
| 1-Heptadecene                          | 32.271  | 6765-39-5  | 2.623               |
| $\Sigma$ (Area.%) =                    |         |            | <b>33.968</b>       |
| <b>Ring containing Alkenes</b>         |         |            |                     |
| 1,3-Cyclopentadiene, 1-methyl-         | 3.630   | 96-39-9    | 0.297               |
| 2-Methylindene                         | 18.194  | 2177-47-1  | 1.513               |
| $\Sigma$ (Area.%) =                    |         |            | <b>1.810</b>        |
| <b>Aromatic Hydrocarbons</b>           |         |            |                     |
| Benzene, (1-methylethyl)-              | 10.704  | 98-82-8    | 0.314               |
| Naphthalene                            | 19.477  | 91-20-3    | 2.139               |
| Naphthalene, 2-methyl-                 | 22.749  | 91-57-6    | 1.455               |
| Naphthalene, 1-methyl-                 | 23.248  | 90-12-0    | 1.348               |
| Phenanthrene                           | 35.127  | 85-01-8    | 1.183               |
| $\Sigma$ (Area.%) =                    |         |            | <b>6.439</b>        |
| <b>Carboxylic Acids</b>                |         |            |                     |
| Propanoic acid                         | 3.949   | 79-09-4    | 0.139               |
| Butanoic acid                          | 5.867   | 107-92-6   | 0.196               |
| Pentanoic acid                         | 8.608   | 109-52-4   | 0.260               |
| Hexanoic acid                          | 11.681  | 142-62-1   | 0.636               |
| 6-Heptenoic acid                       | 14.621  | 1119-60-4  | 0.954               |
| Heptanoic Acid                         | 14.836  | 111-14-8   | 1.719               |
| Octanoic acid                          | 17.913  | 124-07-2   | 0.859               |
| 8-Nonenoic acid                        | 20.654  | 31642-67-8 | 0.659               |
| Nonanoic acid                          | 20.860  | 112-05-0   | 1.904               |
| n-Decanoic acid                        | 23.653  | 334-48-5   | 2.555               |
| Undecanoic acid                        | 26.296  | 112-37-8   | 0.852               |
| n-Hexadecanoic acid                    | 37.929  | 57-10-3    | 6.308               |
| $\Sigma$ (Area.%) =                    |         |            | <b>17.041</b>       |



|                                |        |           |                |
|--------------------------------|--------|-----------|----------------|
| <b>Ketones</b>                 |        |           |                |
| 2-Pentanone, 4-hydroxy-        | 7.245  | 4161-60-8 | 0.085          |
| 2-Heptadecanone                | 36.508 | 2922-51-2 | 2.877          |
| 2-Nonadecanone                 | 42.877 | 629-66-3  | 1.740          |
| $\Sigma$ (Area.%) =            |        |           | <b>4.702</b>   |
| <b>Non-identified Fraction</b> |        |           | <b>2.494</b>   |
| <b>Total</b>                   |        |           | <b>100.000</b> |

---
